# Supplementary material for: Distinct Impacts of Two Types of Developing El Niño–Southern Oscillations on Tibetan Plateau Summer Precipitation
Source: MDPI journal article supplement (doi:10.3390/rs15164030), 2023-08-14
Supplement: s1 [file s1]

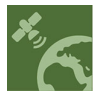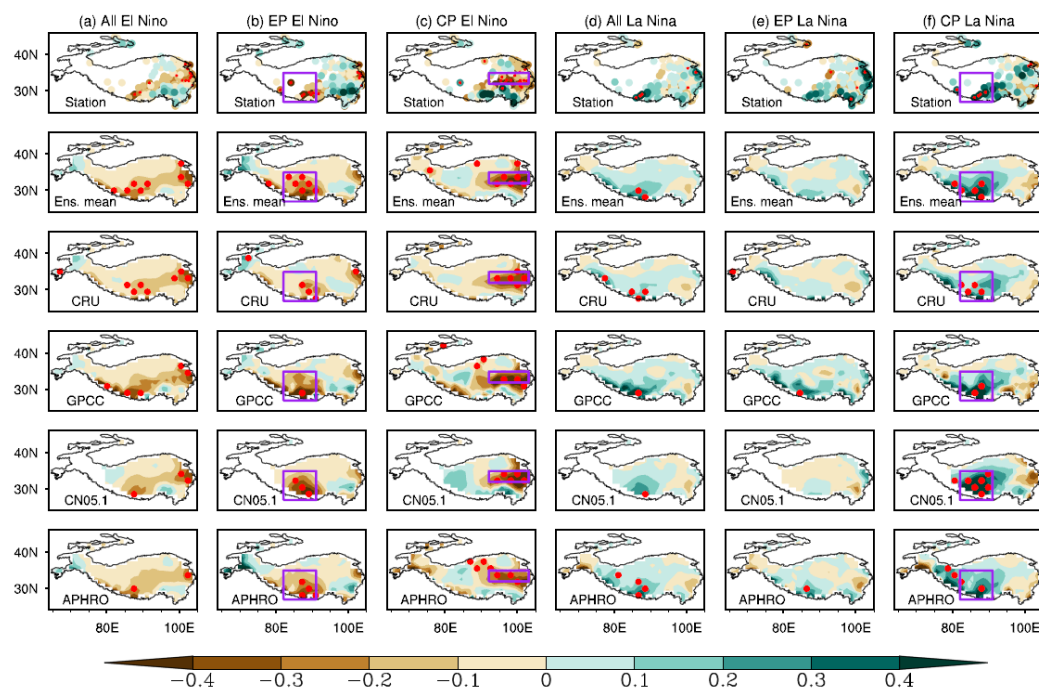

**Figure S1.** Composites of JJAS precipitation (unit:  $\text{mm}\cdot\text{day}^{-1}$ ) over the Tibetan Plateau during different types of ENSO for (a) all El Niño, (b) EP El Niño, (c) CP El Niño, (d) all La Niña, (e) EP La Niña, and (f) CP La Niña events. Panels of each column are station observations from the China Meteorological Administration, the ensemble mean of four gridded datasets, the CRU precipitation, the GPCC precipitation, the CN05.1 precipitation, and the APHRODITE precipitation in turn. The red dotted stations (areas) are statistically significant at the 90% confidence level.
